# Supplementary material for: Is increasing ice crystal sedimentation velocity in geoengineering simulations a good proxy for cirrus cloud seeding?
Source: Copernicus journal article supplement (doi:10.5194/acp-17-4871-2017), 2017-04-13
Supplement: Supplementary file 1 [file acp-17-4871-2017-supplement.pdf]

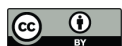

*Supplement of*

## **Is increasing ice crystal sedimentation velocity in geoengineering simulations a good proxy for cirrus cloud seeding?**

**Blaž Gasparini et al.**

*Correspondence to:* Blaž Gasparini (blaz.gasparini@env.ethz.ch)

The copyright of individual parts of the supplement might differ from the CC-BY 3.0 licence.

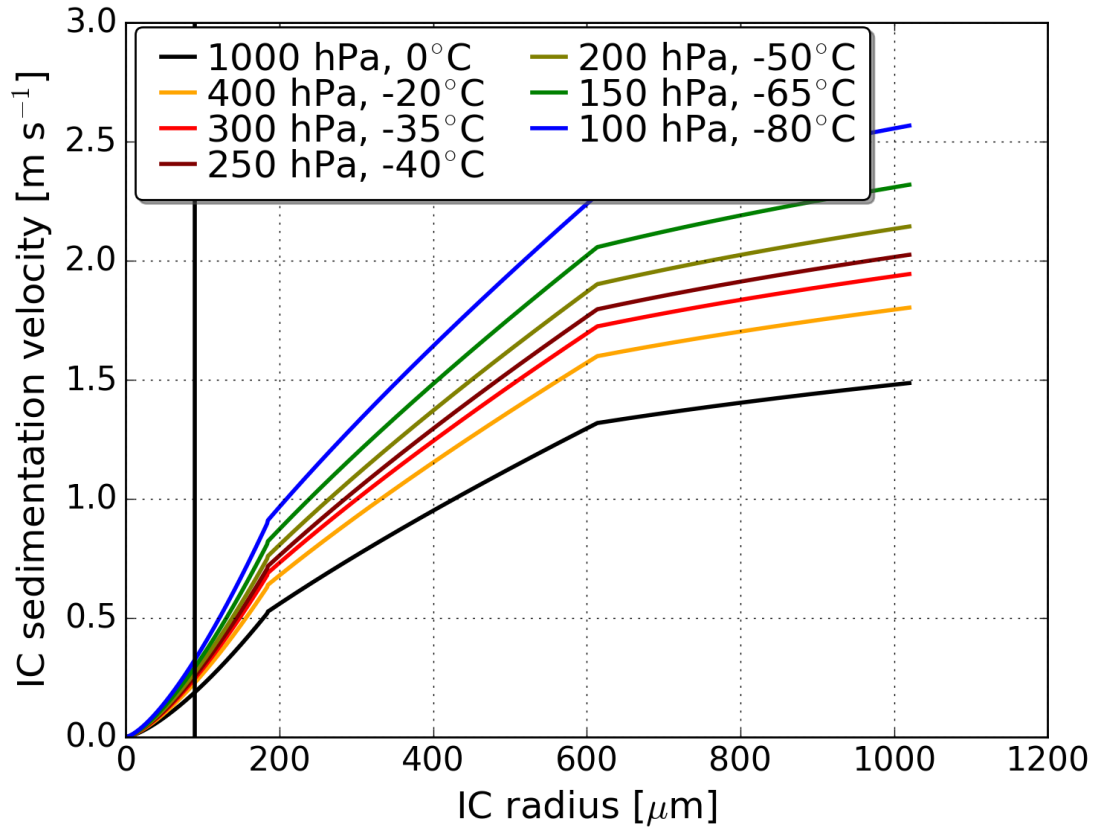

Fig. S1: Same as Fig. 1 but with an expanded IC radius range.

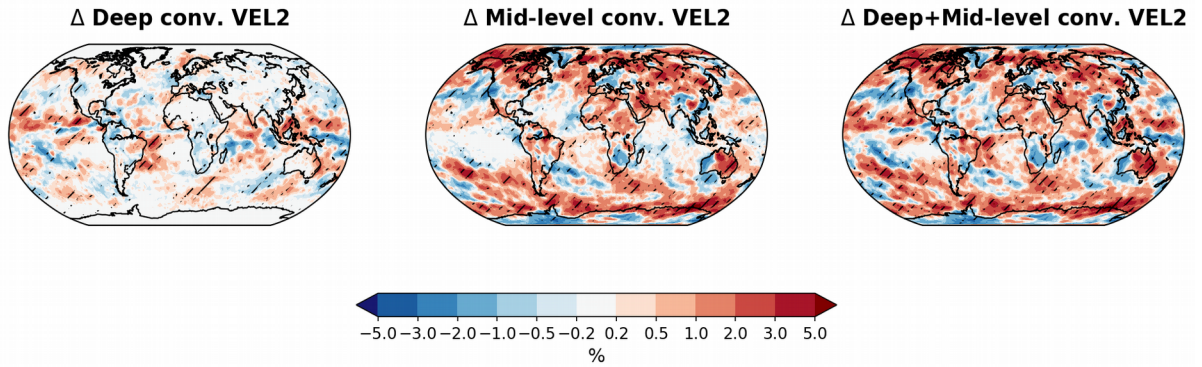

Fig. S2: Difference between the annually averaged occurrence frequency of deep, mid-level or deep and mid-level convection between the fixed SST simulations VEL2 and REF. Hatching is applied for areas at 90% significance level.
